# Supplementary material for: Cobalt nanoparticle–carbon nanoplate as the solar absorber of a wood aerogel evaporator for continuously efficient desalination
Source: Royal Society of Chemistry journal article supplement (doi:10.1039/d1ew00593f), 2021-11-12
Supplement: d1ew00593f1.pdf [file d1ew00593f1.pdf]

## Supporting Information

### **Cobalt nanoparticle-carbon nanoplate as solar absorber of wood aerogel evaporator for continuously efficient desalination**

Yujuan Zhao,<sup>a</sup> Dongyu You,<sup>a</sup> Weiting Yang,<sup>\*a</sup> Han Yu,<sup>b\*</sup> Qinhe Pan,<sup>a</sup> Shuyan Song<sup>c</sup>

<sup>a</sup>Key Laboratory of Advanced Materials of Tropical Island Resources of Ministry of Education, School of Chemical Engineering and Technology, Hainan University, Haikou 570228, P.R. China. E-mail: [yangwt@hainanu.edu.cn](mailto:yangwt@hainanu.edu.cn)

<sup>b</sup>College of Environmental Science and Engineering, Nankai University, Tianjin 300350, PR China. E-mail: [yuhan20159@yahoo.com](mailto:yuhan20159@yahoo.com)

<sup>c</sup>State Key Laboratory of Rare Earth Resource Utilization, Changchun Institute of Applied Chemistry, Chinese Academy of Sciences, 5625 Renmin Street, Changchun, 130022, China

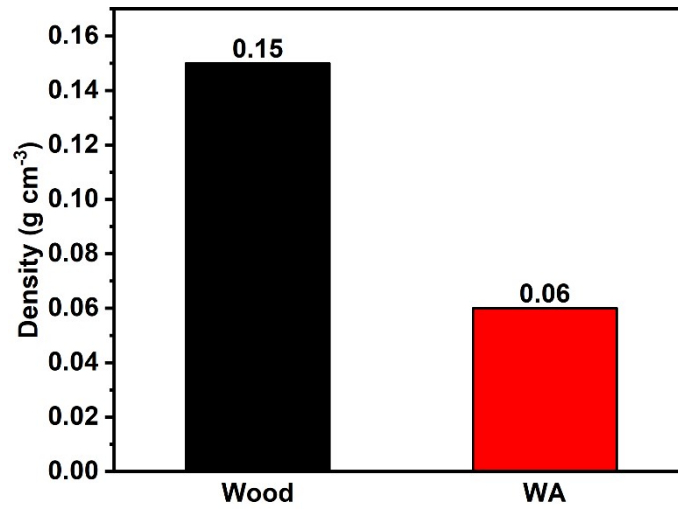

**Figure S1.** Density of wood and WA.

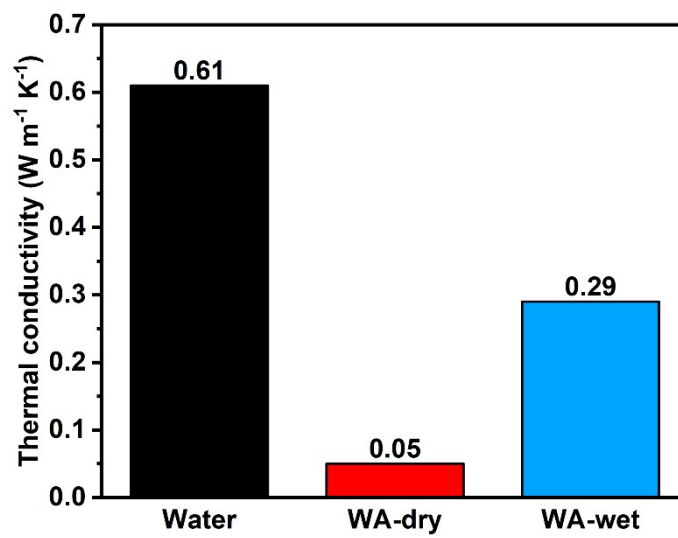

**Figure S2.** Thermal conductivity of water and WA in dry and wet conditions along the tree growth direction.

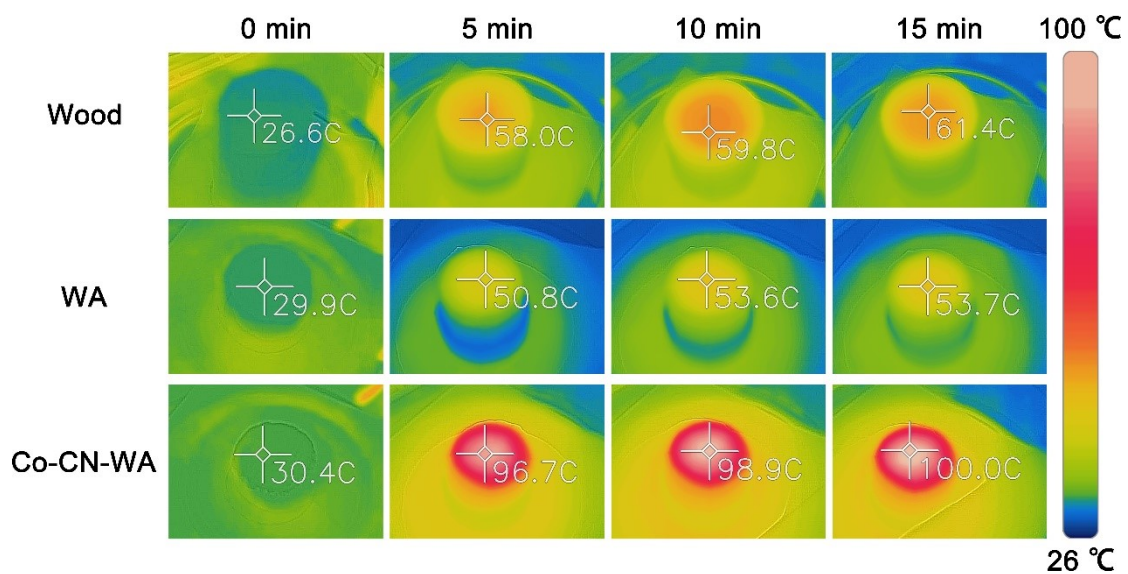

**Figure S3.** Thermal infrared images of wood, WA and Co-CN-WA evaporator at different times under 1 sunlight in dry condition.

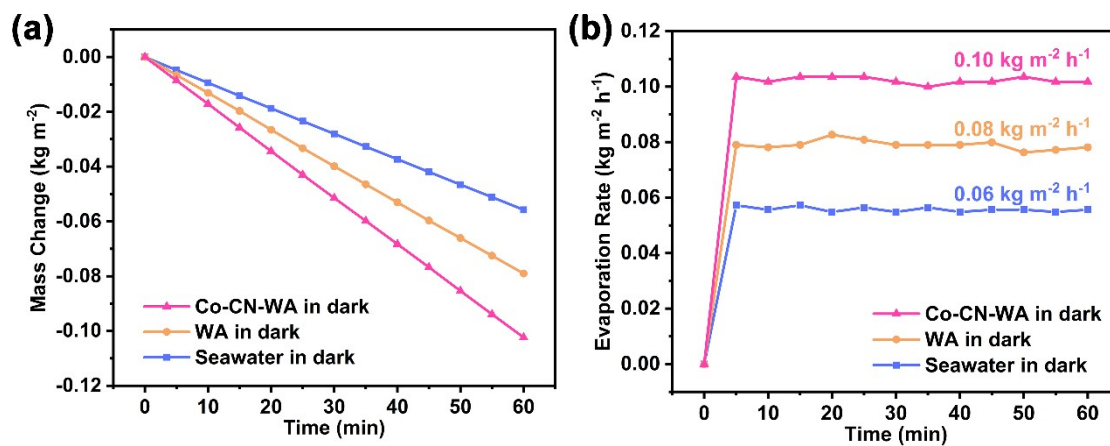

**Figure S4.** (a) Water quality losses of Co-CN-WA, WA and blank seawater evaporation system at different times in the dark. (b) Changes of evaporation rate of Co-CN-WA, WA and blank seawater evaporation system in the dark.

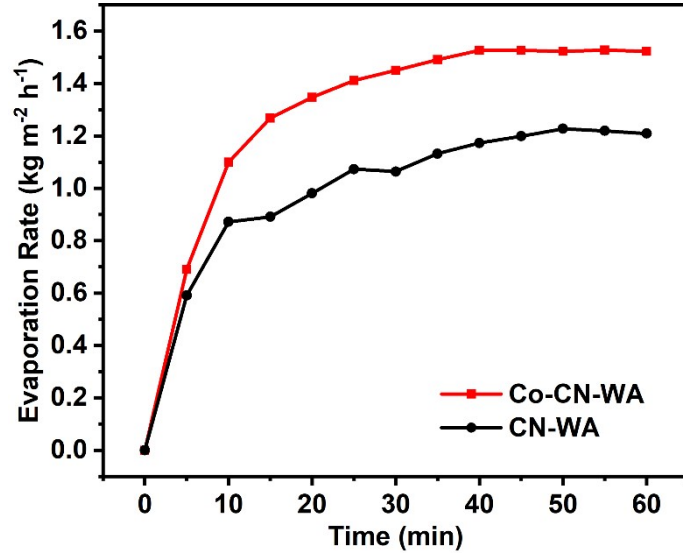

**Figure S5.** Changes of evaporation rate of Co-CN-WA and CN-WA evaporation system under 1 sunlight.

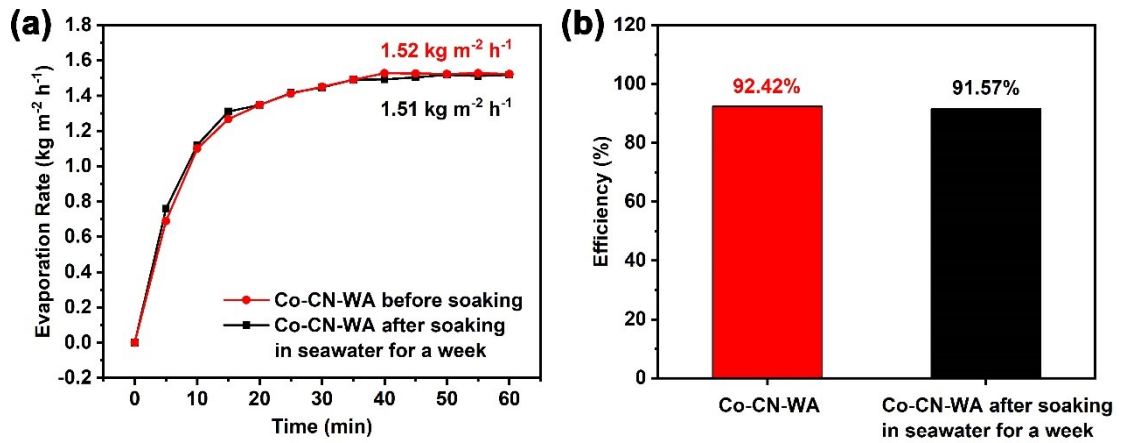

**Figure S6.** (a) Evaporation rate and (b) efficiency of Co-CN-WA before and after soaking in seawater for a week.
